1     **Title: The role of viral interference in shaping RSV epidemics following**  
2                                    **the 2009 H1N1 influenza pandemic**

3

4     **Authors:** Ke Li<sup>1\*</sup>, Deus Thindwa<sup>1</sup>, Daniel M Weinberger<sup>1</sup>, Virginia E Pitzer<sup>1\*</sup>

5

6     **Affiliations:**

7     <sup>1</sup>Department of Epidemiology of Microbial Diseases, Yale School of Public Health, New  
8     Haven, CT, USA.

9     \*Corresponding authors. [ke.li.kl662@yale.edu](mailto:ke.li.kl662@yale.edu), [virginia.pitzer@yale.edu](mailto:virginia.pitzer@yale.edu)

10

11     **One Sentence Summary:** We demonstrated disrupted RSV activity in the United States  
12     following the 2009 influenza pandemic by analyzing weekly positive tests for RSV and the  
13     pandemic H1N1 virus. During the 2009/10 season, RSV experienced reduced activity, which  
14     was negatively associated with the activity of pandemic influenza. In contrast, RSV showed  
15     increased activity in the 2010/11 season due to the buildup of susceptible populations from the  
16     previous season. By focusing on the dynamics of RSV following the pandemic, we found  
17     evidence supporting interactions between the viruses at the population level. Our findings  
18     suggest that infections with pandemic influenza could: 1) reduce host susceptibility to RSV  
19     coinfection, 2) shorten the RSV infectious period in coinfecting individuals, or 3) decrease RSV  
20     infectivity in coinfection.

21

22     **Abstract:** Respiratory syncytial virus (RSV) primarily affects infants, young children, and  
23     older adults, with seasonal outbreaks in the United States (US) peaking around December or  
24     January. Despite the limited implementation of non-pharmaceutical interventions, disrupted  
25     RSV activity was observed in different countries following the 2009 influenza pandemic,  
26     suggesting possible viral interference from influenza. Although interactions between the

**NOTE: This preprint reports new research that has not been certified by peer review and should not be used to guide clinical practice.**

27 influenza A/H1N1 pandemic virus and RSV have been demonstrated at an individual level, it  
28 remains unclear whether the disruption of RSV activity at the population level can be attributed  
29 to viral interference. In this work, we first evaluated changes in the timing and intensity of RSV  
30 activity across 10 regions of the US in the years following the 2009 influenza pandemic using  
31 dynamic time warping. We observed a reduction in RSV activity following the pandemic,  
32 which was associated with intensity of influenza activity in the region. We then developed an  
33 age-stratified, two-pathogen model to examine various hypotheses regarding viral interference  
34 mechanisms. Based on our model estimates, we identified three mechanisms through which  
35 influenza infections could interfere with RSV: 1) reducing susceptibility to RSV coinfection;  
36 2) shortening the RSV infectious period in coinfecting individuals; and 3) reducing RSV  
37 infectivity in coinfection. Our study offers statistical support for the occurrence of atypical  
38 RSV seasons following the 2009 influenza pandemic. Our work also offers new insights into  
39 the mechanisms of viral interference that contribute to disruptions in RSV epidemics and  
40 provides a model-fitting framework that enables the analysis of new surveillance data for  
41 studying viral interference at the population level.

42

43 **Main Text:**

## 44 **INTRODUCTION**

45 Respiratory syncytial virus (RSV) infections are a major public health concern for infants and  
46 young children, causing severe lower respiratory tract infections (1, 2). In 2019, an estimated  
47 13,300 deaths were associated with RSV-induced acute lower respiratory infections in  
48 hospitals, and there were 45,700 RSV-attributed deaths in infants aged 0-6 months worldwide  
49 (3). In the United States (US) and other temperate regions, RSV activity is strongly seasonal,  
50 typically beginning in the fall and peaking in winter (4). During the COVID-19 pandemic in  
51 2020-2021, RSV disappeared for more than a year in the Northern Hemisphere then reemerged

52 out of the normal season (5, 6). This was likely due to the implementation of non-  
53 pharmaceutical interventions (NPIs) to reduce the spread of SARS-CoV-2. However,  
54 disruptions to RSV activity were also observed following the 2009 influenza pandemic in  
55 different countries despite the limited implementation of NPIs (7–12). Viral interference from  
56 the novel 2009 A/H1N1 influenza pandemic (pdmH1N1) virus was suggested as a cause of the  
57 delayed RSV activity.

58

59 Viral interference refers to a phenomenon where one virus prevents or reduces infection by  
60 another virus (13). Several possible mechanisms of interference have been proposed at the  
61 within-host level (14–16). Direct competition between viruses for infection of susceptible cells  
62 can result in viral interference, such that the consumption of target cells by one virus limits  
63 infection by the other. Viral interference can also occur through the host immune response. For  
64 example, antibody-mediated interference has been suggested as a mechanism for mitigating  
65 infection between genetically close viruses, such as RSV and human metapneumovirus (16).  
66 Host interferon responses (IFNs) have also been proposed as a mechanism leading to viral  
67 interference. Chan et al. demonstrated that ferrets infected with pdmH1N1 influenza A virus  
68 (IAV) could be protected from subsequent RSV infection depending upon the interval between  
69 the two infections. They showed that the protection was transient and mediated by the IFNs  
70 (15). More recently, viral interference between IAV and the SARS-CoV-2 was also studied  
71 using human airway epithelial cultures. Cheemarla et al. showed that IAV infection could lead  
72 to a robust IFN response that suppressed subsequent SARS-CoV-2 infection (17). In contrast,  
73 infection with SARS-CoV-2, which elicited a relatively weak immune response, was unable to  
74 suppress IAV infection, suggesting an asymmetric IFN-dependent viral interference  
75 mechanism.

76

77 While it is evident that viral interference occurs at the host level, demonstrating the presence  
78 of viral interference at the population level and quantifying its impact on disease transmission  
79 is more challenging. For example, co-infections with two or more viruses in an individual can  
80 potentially change the typical viral dynamics (e.g., time to infectiousness, symptoms and  
81 severity) in the host, leading to changes in disease transmission patterns at the population level,  
82 as reviewed in (18). To date, most studies that analyzed population-level viral interference have  
83 primarily focused upon statistical associations between reported positive cases of different  
84 viruses, using regression and correlation analyses (16, 19). The method, lacking explicit  
85 mechanistic formulation, was unable to distinguish true viral interaction from other  
86 confounding factors, such as climate variables. Other techniques, including seasonal auto-  
87 regressive integrated moving average models (20) and Granger causality (21, 22), have also  
88 been used to analyze time series of positive tests of viruses, aiming to identify potential  
89 interactions between viruses. However, neither the biological mechanisms underpinning  
90 potential viral interactions, nor the strength of interactions could be determined or quantified  
91 using these models.

92

93 Mathematical models that explicitly depict the underlying mechanisms of viral transmission  
94 have advantages in being able to integrate heterogeneous mechanisms and test different  
95 hypotheses (23–25). Some mathematical models have been proposed to study the effect of viral  
96 interference between RSV and influenza viruses at the population level and to quantify the  
97 interactions by fitting the models to incidence data (26–28). However, these models did not  
98 capture the natural infection history of RSV, which are characterized by intermediate immunity  
99 lying between perfectly and imperfectly immunizing infections (29). In this work, we started  
100 by analyzing laboratory-confirmed cases of RSV and the pdmH1N1 virus in different regions  
101 in the US. We applied a dynamic time warping and hierarchical clustering method to identify

102 atypical RSV seasons following the 2009 influenza pandemic. We then built a mechanistic,  
103 age-stratified mathematical model that incorporates an RSV transmission model into an  
104 influenza transmission model, coupled with hypothesized viral interference mechanisms.  
105 Using Latin Hypercube Sampling to explore the parameter space, we simulated various  
106 scenarios for influenza dynamics and quantified the potential interactions between RSV and  
107 pdmH1N1 influenza virus at the population level.

108

## 109 **RESULTS**

### 110 **RSV activity following the 2009 influenza pandemic**

111 RSV epidemics exhibit consistent seasonal timing and duration within each region of the US,  
112 with variation in timing between regions (**Fig. 1A** and **Fig. S1**). Annual RSV epidemics start  
113 in the fall and peak in the winter. Some regions (e.g., Regions 8 and 10 in the Upper Midwest  
114 and Northwest) exhibit biennial patterns, with RSV tending to start and peak earlier with a  
115 larger epidemic in even-numbered seasons (e.g., 2010/11 and 2012/13) compared to the odd-  
116 numbered years (e.g., 2009/10 and 2011/12). The influenza pandemic (the shaded area, **Fig.**  
117 **1A** and **Fig. S1**) began in April 2009, after the 2008/09 RSV season (dashed black lines). This  
118 was followed by a second wave in most regions that started at the end of 2009, before the peak  
119 of the 2009/10 RSV season. In our analysis, we focus on RSV activity during the 2009/10  
120 season, when the pdmH1N1 virus was the sole influenza virus circulating in the population,  
121 and the 2010/11 season following the pandemic.

122

123 Based on the laboratory reports of RSV-positive specimens (**Fig. 1A**), we quantified RSV  
124 activity following the pandemic season and in other normal epidemic seasons. Regions 1 and  
125 4 (Northeast and Southeast) exhibited consistent annual patterns of RSV activity, with a steady  
126 onset and peak timing in different seasons, including the 2009/10 pandemic year (**Fig. 1B**).

127 However, we observed delayed RSV activity in 2010/11 compared with other seasons in the  
128 two regions, as indicated by a shift of intense RSV activity to later epidemic weeks. Again,  
129 Regions 8 and 10 showed a biennial pattern of RSV epidemics with an earlier onset and peak  
130 timing in even-numbered years (**Fig. 1B**). In these regions, delayed RSV activity was also  
131 evident in 2010/11 compared to other even-numbered years, and no notable shifts in the timing  
132 of RSV activity were observed in the 2009/10 season.

133

### 134 **Clustering RSV activity using dynamic time warping**

135 Epidemic curves often exhibit variations in reporting intervals and temporal dynamics, making  
136 it difficult to identify dissimilarities in disease spread patterns. To better identify and  
137 characterize potential time shifts in RSV activity following the pandemic, we used dynamic  
138 time warping (DTW) to compare RSV activity in the 2009/10 and the 2010/11 seasons with  
139 other epidemic seasons. The fundamental concept of DTW is to find the optimal alignment  
140 between multiple time series, allowing the adjustment of the timing of one of the time series  
141 while minimizing the distance between corresponding data points (30). An optimal alignment  
142 shows the indices of the elements in the query time-series that correspond to those in the  
143 reference time series (e.g., RSV time-series in the 2009/10 and 2010/11 seasons). The  
144 computed optimal alignment paths for RSV activity during the 2009/10 and 2010/11 seasons  
145 with respect to other seasons are provided in **Fig. S2**. We found that the alignment paths cross  
146 below the diagonal line for the 2010/11 season, indicating delayed RSV activity as depicted in  
147 **Fig. 1B**.

148

149 The hierarchical clustering results of seasonal RSV activity are given in **Fig. 2**. In Region 1  
150 (**Fig. 2A**) and Region 4 (**Fig. 2B**), the seasons following the pandemic (i.e., 2009/10 and

151 2010/11) were closer in the dendrogram, grouped into the same cluster, compared with other  
152 seasons before or after the pandemic (as shown in the dashed box). This indicated more similar  
153 trends of RSV activity in these years. We also observed that even within the same cluster, the  
154 2009/10 season (highlighted in blue) was distant from the 2010/11 season (highlighted in red),  
155 suggesting a different pattern between the two seasons following the pandemic. Notably, the  
156 hierarchical clustering method successfully captured the biennial pattern in Region 8 (**Fig. 2C**),  
157 Region 10 (**Fig. 2D**), and other regions in the US (**Fig. S3**), grouping even seasons and odd  
158 seasons into different clusters. Specifically, the 2009/10 season was grouped with even-year  
159 seasons in Region 8, indicating unusual RSV activity. While the 2010/11 season in Region 10  
160 shares a cluster with other even-year seasons, its extended branch length in the dendrogram  
161 indicated a distinction from the other even-year seasons.

162

### 163 **Linking RSV activity and the 2009 influenza pandemic**

164 We further quantified RSV activity following the pandemic seasons across 10 regions of the  
165 US. Both the intensity and the center of gravity for each RSV epidemic season in each region  
166 were calculated. The onset time of RSV activity for each season was also calculated. There was  
167 a strong positive correlation (i.e.,  $\rho = 0.92$ ) between the center of gravity and onset time of  
168 RSV activity, indicating these two methods of measuring epidemic timing agree (see **Fig. S4**).  
169 We explored the trends of RSV activity in the 2009/10 and 2010/11 years across the US  
170 regions, assessing changes in both intensity and center of gravity in comparison to the median  
171 values of all other seasons in the same region (**Fig. 3**). Most regions in the US experienced  
172 decreased RSV intensity in the 2009/10 season, with the timing of RSV activity consistent with  
173 that of other seasons. By contrast, most regions in the US showed increased RSV intensity,  
174 with delayed peak timing in the 2010/11 season. We then computed the intensity of the  
175 pdmH1N1 virus, starting from April 2009 to May 2010. We found a negative association

176 between the intensity of RSV and the intensity of the pdmH1N1 virus (**Fig. 4A**)—enhanced  
177 influenza intensity was associated with decreased RSV intensity in the 2009/10 season (i.e.,  
178  $\rho = -0.38$ ). The negative correlations between RSV activity and pdmH1N1 activity suggested  
179 the presence of viral interference from influenza on RSV transmission. No correlations were  
180 found between the intensity of the pdmH1N1 virus and the intensity of RSV (**Fig. 4B**) or the  
181 timing of RSV peak in 2010/11 (**Fig. S5**).

182

### 183 **Transmission model analyses**

184 To explore and examine various hypotheses on the mechanistic relationship between RSV  
185 activity and viral interference from influenza that might explain the statistical associations  
186 observed, we proposed a mathematical model that explicitly incorporated the transmission  
187 dynamics of RSV into that of the pdmH1N1 virus via three hypothetical viral interaction  
188 mechanisms (see **Materials and Methods** for detailed model description). We hypothesized  
189 that in hosts infected with pdmH1N1 virus, the IFN response leads to: 1) a reduction of the  
190 host's susceptibility to subsequent RSV infections (**Fig. S6A**), which was captured by a  
191 parameter  $\theta$ ; 2) a reduction of the infectious period of RSV co-infection (**Fig. S6B**), captured  
192 by a parameter  $\eta$ ; and/or 3) a reduction of the force of infection of RSV (**Fig. S6C**), captured  
193 by a parameter  $\xi$ . Detailed model equations are provided in the **Supplementary Materials**.

194

195 The three proposed mechanisms were studied separately as Models I-III. For each mechanism,  
196 we first used Latin Hypercube Sampling (LHS) to generate a wide range of parameter values  
197 that allowed us to simulate different transmission dynamics of pandemic influenza in the  
198 2009/10 season and explore the effects of viral interference (including the possibility of no  
199 interference when  $\theta = 1$ ,  $\eta = 1$  or  $\xi = 1$ ). We then determined the goodness-of-fit of the models



200 based on the negative log-likelihood of the models fitted to the number of RSV-positive tests,  
201 and filtered the models to the top 2% best-fitting models to identify the corresponding  
202 parameter ranges for the viral interference mechanisms.

203

204 The best 2000 (i.e., top 2%) fitting models successfully captured the difference in relative  
205 intensity of RSV activity during the 2009/10 and the 2010/11 seasons; however, the best-fit  
206 models failed to capture the shift in timing of RSV activity during 2010/11. Based on the  
207 calculated likelihood, the model without viral interference (green curves in **Fig. 5**) was not  
208 included in the top 2% of models. The reduction of the host's susceptibility to RSV infection  
209 (Model I, **Fig. 5A**), the RSV infectious period (Model II, **Fig. 5B**), or the force of infection of  
210 RSV (Model III, **Fig. 5C**) led to decreased RSV activity in the 2009/10 season, followed by  
211 increased RSV cases in the 2010/11 season. The relative intensity of RSV activity between the  
212 two seasons could not be reproduced in the absence of viral interference mechanisms. Similar  
213 results were observed for the top 3% (**Fig. S7**) and top 5% (**Fig. S8**) of the models, such that  
214 the models also captured the relative intensity of RSV activity in the 2009/10 and 2010/11  
215 seasons following the pandemic. Further, our models demonstrated that increased RSV activity  
216 in the 2010/11 season could be explained by an increase in the proportion of the population  
217 susceptible to RSV infection, as shown in **Fig. S9**.

218

219 The identified parameter spaces for  $\theta$ ,  $\eta$  and  $\xi$  from the top 2% best-fitting models for Region  
220 1 provide insight into the effect of viral interference from influenza influencing RSV infection  
221 and transmission (**Fig. 6**). The median estimate for the reduction of host susceptibility to RSV  
222 infection when infected with influenza virus ( $\theta$ ) was 0.44 (95% CI: 0.23-0.60, **Fig. 6A**). In  
223 epidemiological terms, the median estimate for  $\theta$  indicates that the presence of the pdmH1N1

224 infection reduces the likelihood of hosts being subsequently infected with RSV by nearly 60%.  
225 The median estimate for  $\eta$  implies the presence of the pdmH1N1 co-infection halves the RSV  
226 infectious period, i.e. increases the rate of recovery by a factor 1.98 (95% CI: 1.62-2.53, **Fig.**  
227 **6B**). Similarly, the median estimate for  $\xi$  was 0.46 (95% CI: 0.20-0.80, **Fig. 6C**), suggesting  
228 the pdmH1N1 infection reduces RSV infectivity by 53%. The parameter distributions from the  
229 top 3% and top 5% of the fitted models were similar (**figs. S10-11**). Given the best-fit parameter  
230 distributions for the viral interference parameter excluding 1, our results suggest that viral  
231 interference plays a role in mediating the dynamics of RSV infection following influenza  
232 infection for all of the proposed mechanisms.

233

234 Our models were also able to capture the trends of RSV activity in Region 10 (showing a  
235 biennial RSV pattern) and Region 4 (where seasonal RSV activity is the earliest in the US).  
236 From the identified parameter space of the viral interaction terms, similar results were found  
237 showing strong viral interference between RSV and pdmH1N1 virus in Region 10 (**Fig. 6D-**  
238 **F**). The median estimate of the reduction in host susceptibility to RSV infection ( $\theta$ ) was 0.61  
239 (95% CI: 0.42-0.74, **Fig. 6D**), the relative rate of recovery from co-infection ( $\eta$ ) was 1.5 (95%  
240 CI: 1.28-2.22, **Fig. 6E**), and the relative RSV infectivity ( $\xi$ ) was 0.62 (95% CI: 0.42-0.75, **Fig.**  
241 **6F**). By contrast, we found weak interference effects between the viruses in Region 4, such that  
242 all estimated parameters were closed to 1 (**Figs. 6G-I**).

243

244 With the identified viral interference parameters, we further predicted the co-infection rate of  
245 RSV and pdmH1N1 influenza virus in different age groups following the pandemic in the  
246 presence or absence of viral interference. The rate was computed as the fraction of infections  
247 in each age group that were co-infections. We found that the presence of viral interference

248 reduced the co-infection rate in all age groups (**Fig. S12**). In particular, our model showed that  
249 the effect was even more profound at the young age groups (i.e., < 1 year old), reducing the  
250 co-infection rate from 2% to 0.8%. Such patterns could be explained by the age-specific  
251 likelihood of a susceptible individual coming into contact with an infectious individual.

252

## 253 **DISCUSSION**

254 By focusing on the dynamics of RSV following the 2009 H1N1 influenza pandemic, we found  
255 evidence supporting the presence of interactions between the viruses at the population level  
256 and examined the underlying mechanisms. This was accomplished using statistical analysis of  
257 laboratory-confirmed positive tests of both viruses in 10 regions of the US and a mathematical  
258 modeling approach. Using a dynamic time warping and hierarchical clustering method, we  
259 identified atypical RSV activity following the 2009 influenza pandemic. The results support  
260 and contribute to the current knowledge from several observational studies that RSV activity  
261 was disrupted following the pandemic (7–12). We further showed there was a negative  
262 correlation between the intensity of RSV and pdmH1N1 activity during the pandemic. Using a  
263 two-pathogen, age-stratified transmission model, we assessed potential interactions between  
264 the viruses and identified three mechanisms of viral interference that can replicate the relative  
265 difference of RSV activity in the two epidemic seasons following the pandemic. The identified  
266 parameter space suggested that infection with the pdmH1N1 virus could reduce either the  
267 host's susceptibility to a subsequent RSV infection, or the infectious period of RSV infection,  
268 or RSV infectivity.

269

270 Although the presence of viral interference between different pathogens is evident at the host  
271 level (15, 31, 32), demonstrating the impact of this phenomenon at the population poses a

272 significant challenge. Mechanistic models provide a valuable approach for dissecting the casual  
273 relationship among different components, integrating heterogeneous mechanisms and testing  
274 various hypotheses. One of the most important applications of mechanistic models is to  
275 estimate key parameters, as reviewed in (33). Parameter identifiability for data fitting is an  
276 important but unresolved challenge in modeling work due to model complexity or limited time-  
277 series on numerous quantities of interest (34–36). Waterlow et al. have previously highlighted  
278 the importance of parameter identifiability (26). They conducted a simulation and back-  
279 estimation study to evaluate the plausible parameter space of viral interaction parameters in an  
280 RSV-influenza model. By fitting the model to a single season of simulated data, however, they  
281 demonstrated that the inference results for the interaction parameters were often imprecise,  
282 indicated by large credible intervals. By contrast, we specifically focused on the RSV-  
283 pdmH1N1 pair in our study. During the 2009/10 epidemic season, the pdmH1N1 virus emerged  
284 as the only circulating influenza virus, dominating the population. The outbreak of pdmH1N1  
285 virus provided an opportunity to investigate viral interference between pdmH1N1 and RSV.  
286 With the availability of regional-level data, we were able to dissect variations in the temporal  
287 dynamics (i.e., annual/biennial patterns) of RSV activity in different regions in the US and  
288 estimate the interaction parameters between the viruses. A key finding of the models suggests  
289 that the strength of interaction between the viruses could be estimated from surveillance data  
290 of both viruses in such situations, revealing that the activity of pdmH1N1 has an appreciable  
291 impact on RSV activity.

292

293 At the individual level, the host interferon response has been shown to be the mechanism  
294 underpinning viral interference between RSV and the pdmH1N1 virus (15). Depending upon  
295 the interval between pdmH1N1 and RSV infections, the within-host viral production of RSV  
296 could be completely suppressed, reduced, delayed, or shortened. Based on the within-host RSV

297 viral dynamics, we proposed three mechanisms through which innate immunity, stimulated by  
298 the pdmH1N1 virus, could modulate the following RSV coinfection. The model fits showed  
299 that each of the three mechanisms could successfully recapitulate a decrease in RSV activity,  
300 followed by an enhanced RSV epidemic, in the two seasons following the pandemic. Our model  
301 demonstrated that the increased intensity of the 2010/11 RSV season could be attributed to an  
302 increased proportion of susceptible individuals in the population. Baker et al. similarly showed  
303 that population susceptibility to influenza and RSV infections increased during the COVID-19  
304 pandemic, leading to larger outbreaks following the relaxation of NPIs (37). More recently,  
305 Lowensteyn et al. showed that the unprecedented RSV epidemic following the COVID-19  
306 pandemic in the Netherlands was associated with waning immunity to RSV due to low  
307 circulation of RSV during the NPIs period (38).

308

309 We note that none of the mechanisms considered in the model, including the null model (i.e.,  
310 no viral interference), could capture the shift in timing of the 2010/11 RSV epidemic. One  
311 possible explanation would be that we only assumed a transient viral interference interval  
312 lasting up to a week, occurring in co-infected individuals and disappearing when the infection  
313 resolves. The IFN response was not explicitly considered in our model, and could persist  
314 slightly longer than the influenza infectious period. Although previous studies have suggested  
315 that cross-protection following influenza infection against RSV could last more than two weeks  
316 (39), this was not demonstrated in a ferret model, which shares several similarities with the  
317 respiratory tracts of humans (40). The duration of cross-protection between RSV and the  
318 pdmH1N1 virus only lasted a week in ferrets, as shown in (15).

319

320 Delayed RSV activity in the 2010/11 season could also be explained by the circulation of other  
321 respiratory viruses (e.g., rhinovirus and influenza B virus), which our model did not explicitly  
322 include. Here, our focus was not on exploring virus interactions among multiple influenza  
323 strains and RSV in general. Instead, our specific emphasis was on studying viral interference  
324 from the pdmH1N1 virus on RSV infection, where the interactions are evident at the host level.  
325 This focus was guided by experimental studies indicating that the genetic strains of influenza  
326 viruses elicit varying levels of host immunity (41). We also assumed that the RSV-influenza  
327 interaction was unidirectional during the 2009/10 season, meaning that only the pdmH1N1  
328 virus would exhibit interference on RSV. This assumption is justified considering that the  
329 influenza pandemic preceded the normal 2009/10 RSV season, and our analysis focused on the  
330 disruption in RSV activity following the 2009 influenza pandemic. Note that neither could, nor  
331 did we intend to show the absence of viral interference from RSV against influenza viruses. To  
332 study viral interference from RSV in shaping the transmission dynamics of influenza may  
333 require time-series data from multiple epidemic seasons, as shown in a modeling study (27).

334

335 Besides potential viral interference, other factors can also change disease transmission patterns,  
336 leading to the variations between model predictions and the surveillance data. Behavioral  
337 changes can have significant impacts on viral circulation and transmission patterns, as observed  
338 during the COVID-19 pandemic (42). After the implementation of NPIs, there was a sharp  
339 decline in the number of positive RSV tests, and RSV activity remained disrupted in the  
340 following seasons (5, 43). It is not clear how much of a role, if any, viral interference from  
341 SARS-CoV-2 played in disrupting RSV activity. Understanding the interplay of the effects of  
342 NPIs and viral interference is important to evaluate the role of behavioral and immunological  
343 factors more accurately on disease transmission. Additionally, environmental factors such as  
344 temperature and humidity (29) and vaccination coverage (44) can also play roles in shaping the

345 trajectory of disease spread. Incorporation of these factors into the dynamic model can be  
346 improved in future work upon data availability.

347

348 Dynamic time warping (DTW) is a widely used statistical algorithm (30, 45), but its application  
349 in identifying various disease transmission patterns has been limited. Recently, multiple studies  
350 have used DTW to analyze the trajectories of COVID-19 in different countries, aiming to  
351 identify, cluster and predict future trends in disease transmission (46–49). Here, we utilized  
352 DTW to examine and visualize similarities of RSV time-series, yielding clusters of RSV  
353 activity before and after the 2009 influenza pandemic in the ten different regions of the US.  
354 The method successfully identified the biennial pattern of RSV epidemics in certain regions of  
355 the US and atypical RSV seasons following the pandemic. The graphical representation of  
356 clusters based on DTW provides an accessible and interpretable method for comparing both  
357 temporal and spatial time-series of incidence data, enhancing our understanding of disease  
358 transmission patterns longitudinally or geographically. The DTW method also has a promising  
359 potential for detecting and identifying atypical epidemic seasons.

360

361 We identified three plausible viral interference mechanisms that could shape RSV epidemics  
362 following the influenza pandemic. We do acknowledge that these mechanisms are not mutually  
363 exclusive. This raises the question of what kind of data would be needed to further distinguish  
364 among the models and examine the relative importance of each mechanism for RSV  
365 transmission. One possible direction would be to emphasize the incidence of coinfections over  
366 a period of time. By fitting the prevalence of coinfections to mathematical models, we could  
367 estimate essential kinetic parameters separately, such as the force of infection or the recovery  
368 rate from the coinfecting components. The comparison between these estimated parameter

369 values and the baseline values (i.e., the rates from individuals infected with one virus) helps  
370 discern different mechanisms and evaluate the relative contribution of each process.

371

372 Our study provides statistical and mathematical support for the presence of viral interference  
373 between the pdmH1N1 influenza virus and RSV at the population level. Multiple mechanisms  
374 mediated by the host immune response are capable of explaining RSV transmission dynamics  
375 following the 2009 influenza pandemic. Given the experimental support for within-host  
376 interference between RSV and influenza through IFN responses, all of these mechanisms could  
377 contribute to shaping RSV epidemics. The results have implications for implementing and  
378 evaluating disease control interventions. For example, mitigation measures that effectively  
379 decrease disease transmission could decrease the epidemic size in the current season but  
380 potentially lead to a larger outbreak in the following season, even if the measures are applied  
381 for only a week (i.e., transient protection). Hence, it is imperative to deliberate upon the optimal  
382 degree of disease suppression and the duration for which interventions should be applied prior  
383 to their implementation, as discussed in (50).

384

385 There are some limitations to our study. First, we did not have age information on the positive  
386 tests for RSV and influenza over time. Therefore, we assumed a well-mixed population and did  
387 not account for varying levels of immunity across different age groups beyond the age-specific  
388 contact matrices. It is possible that influenza virus stimulates a weaker innate immune  
389 response in young children compared to other age groups (51). In our model, the estimated  
390 interference parameters are interpreted as the average effects of viral interaction across the  
391 entire population. Although our model cannot be used to assess the strength of viral interference  
392 in each age group, our results are still sufficient to demonstrate the presence of viral



393 interference between pdmH1N1 and RSV within the population in general. Another limitation  
394 of our analyses is that our model did not take into account other circulating pathogens (e.g.,  
395 rhinovirus or human parainfluenza virus) due to the added complexity and additional  
396 parameters required. For example, interference between rhinovirus and influenza viruses was  
397 recognized by epidemiological observations (31), and the delayed 2009 influenza pandemic in  
398 Europe was attributed to the prevalence of rhinovirus (7). The analysis of viral interference  
399 between the pandemic influenza virus and other viruses will be left for future work.  
400 Additionally, our model estimates did not show strong viral interference effects between the  
401 viruses in Region 4. The difference in the estimates of viral interference for Region 4 is likely  
402 attributable to the different pdmH1N1 activity in this region. In Regions 1 and 10, there was a  
403 strong second wave of pdmH1N1 before the 2009/10 RSV season, whereas the second  
404 pdmH1N1 wave was not observed in Region 4. It is not clear why the pandemic influenza  
405 exhibited different activity in these regions.

406

407 Our findings, which indicate an association between the incidence of RSV infections and  
408 pdmH1N1 infections, also have implications for enhanced surveillance of disease transmission  
409 of other viruses. As other respiratory viruses (e.g., seasonal influenza viruses and SARS-CoV-  
410 2) are expected to co-circulate in the upcoming epidemic seasons, our study provides a  
411 framework for studying viral interactions and understanding transmission dynamics.  
412 Additional information on the frequency of RSV and other viruses, along with coinfections,  
413 would enable us to further validate our results. The mechanistic model proposed in this work  
414 is flexible to incorporate the effects of vaccination in preventing disease, such as introducing a  
415 model compartment that is resistant to infection and becomes susceptible over time. The  
416 extended model can be used for the evaluation of various vaccination scenarios, assessing the  
417 impact of vaccination coverage on long-term disease patterns while considering the presence

418 of viral interference. Through systematic analysis of these scenarios, our model can provide  
419 valuable insights into the dynamic interplay between vaccination strategies and the patterns of  
420 disease transmission, contributing to informed decision-making in public health interventions.

421

## 422 **MATERIALS AND METHODS**

### 423 **Laboratory reporting of RSV and influenza**

424 Weekly data on laboratory reporting of RSV tests in ten Health and Human Services (HHS)  
425 regions in the US from June 2007 to July 2019 were obtained from The National Respiratory  
426 and Enteric Virus Surveillance System ([https://data.cdc.gov/Laboratory-](https://data.cdc.gov/Laboratory-Surveillance/Respiratory-Syncytial-Virus-Laboratory-Data-NREVSS/52kb-ccu2/about_data)  
427 [Surveillance/Respiratory-Syncytial-Virus-Laboratory-Data-NREVSS/52kb-ccu2/about\\_data](https://data.cdc.gov/Laboratory-Surveillance/Respiratory-Syncytial-Virus-Laboratory-Data-NREVSS/52kb-ccu2/about_data)).

428 The regional map can be found on the [https://www.hhs.gov/about/agencies/iea/regional-](https://www.hhs.gov/about/agencies/iea/regional-offices/index.html)  
429 [offices/index.html](https://www.hhs.gov/about/agencies/iea/regional-offices/index.html) website. Positive RSV tests were detected using three diagnostic methods:  
430 1) antigen detection; 2) reverse transcription polymerase chain reaction (RT-PCR); and 3) viral  
431 culture. Correspondingly, the data on laboratory reporting of influenza tests in the US from the  
432 same period were obtained from the Center for Disease Control and Prevention (CDC) website  
433 [https://gis.cdc.gov/grasp/fluview/flu\\_by\\_age\\_virus.html](https://gis.cdc.gov/grasp/fluview/flu_by_age_virus.html).

434

435 The raw laboratory data were rescaled based on the number of positive tests to account for  
436 variations in testing practices over time (29). We first calculated a one-year moving average of  
437 the weekly number of RSV or influenza tests (both positive and negative tests) in each region  
438 centered on each week. We then calculated a weekly scaling factor for each region equal to the  
439 average number of RSV or influenza tests during the entire period of reporting (i.e., 12  
440 epidemic seasons from 2007-2019) divided by the one-year moving average. The rescaled  
441 number of RSV or influenza-positive tests for each region was then calculated as the reported

442 number of positive tests multiplied by the weekly scaling factor. The rescaled data for RSV  
443 and influenza are shown in **Fig. 1** and **S1**.

444

#### 445 **Demographic Data**

446 Information about population size in each age group was obtained from the US Census  
447 Bureau's American Community Survey. Birth rates varied between regions and over time  
448 based on the crude annual birth rate for each HSS region from 1990 to 2019. These were  
449 obtained from <https://wonder.cdc.gov/controller/datarequest/D66>. To capture aging among  
450 infants and children more accurately in our mathematical model, we divided the <1 year and  
451 1-4 years age class into 12-month age groups. The remaining population was divided into 5  
452 classes: 5-9 years, 10-19 years, 20-39 years, 39-60 years and >60 years old. Individuals were  
453 assumed to age exponentially into the next age class, with the rate of aging equal to the  
454 multiplicative inverse of the width of the age class.

455

#### 456 **The onset timing, center of gravity, and intensity of RSV activity**

457 To determine the onset timing (measured by week) of each seasonal RSV epidemic for each  
458 region, we initially fitted a p-spline curve to the RSV incidence data. We then calculated the  
459 first and second derivatives of the fitted curve. The onset timing corresponds to the time point  
460 at which the second derivative of the fitted p-spline curve reaches its maximum value during  
461 the increasing segment of the first derivative (52). The center of gravity of RSV activity for  
462 each season in each region ( $G_{s,r}$ ) was measured as the mean epidemic week, with each week  
463 weighted by the number of positive tests, such that  $G_{s,r} = \sum_{w \in [1:52]} w \times Y_{s,r,w} /$   
464  $\sum_{w \in [1:52]} Y_{s,r,w}$ , where  $w$  is an index for the week of each epidemic year, and  $Y_{s,r,w}$  is the  
465 number of rescaled positive RSV tests in region  $r$  during epidemic season  $s$  and week  $w$ . To

466 determine the RSV intensity for each season and region, we also used the fitted p-spline curve.  
467 The epidemic peak timing was determined at the point when RSV activity reaches its  
468 maximum. The intensity of RSV was calculated as the fraction of positive tests before the  
469 epidemic peak timing, corresponding to the integral of the positive first derivative of the log-  
470 transformed fitted p-spline curve.

471

## 472 **Dynamic time warping and hierarchical clustering**

473

474 We used a dynamic time warping (DTW) (see a review for details (53)) to calculate the  
475 pairwise non-linear alignment of the 12 RSV time-series (corresponding to the 12 seasons) in  
476 each region of the US (**Fig. S2**) and quantify dissimilarity between those time-series. The DTW  
477 algorithm computed the optimum warping path between two series under certain constraints,  
478 including monotonicity, continuity, warping window, and boundary (53). The R packages *dtw*  
479 and *dtwclust* facilitated the implementation of the algorithm and optimization (54).

480

481 After calculating distances, a local cost matrix (*lcm*) was generated with dimensions of  $n \times m$ ,  
482 where  $n$  and  $m$  represent the lengths of the pairwise time series. Considering the input time  
483 series  $Q$  and  $S$ , for each element  $(i, j)$  of the *lcm*, the distance between  $Q_i$  and  $R_j$  was computed,  
484 such that  $lcm(i, j) = (\sum |Q_i - R_j|^p)^{1/p}$ . The DTW algorithm thereby identifies the path that  
485 minimizes the alignment between pairwise time-series  $Q$  and  $R$  by iteratively stepping through  
486 the *lcm*, starting at  $lcm(1,1)$  and finishing at  $lcm(n, m)$ , while aggregating the cost. At each  
487 step, the algorithm determines the direction in which the cost increases the least under the given  
488 constraints.

489

490 To limit the area of the *lcm* that the DTW algorithm must traverse, we implemented the Sakoe-  
491 Chiba window as a global constraint (54). This constraint confines the allowed region along  
492 the diagonal of the *lcm*. To select an optimal window size for hierarchical clustering, we  
493 evaluated clustering using the modified Davies-Bouldin (DB) internal cluster validity index  
494 (CVI), iterating across different values of window size from 1 to 52, corresponding to 1 to 52  
495 weeks, while keeping cluster size as 3. For each window size, the DB CVI calculated distances  
496 from computed cluster centroids

497

498 We subsequently performed hierarchical clustering on the distances of aligned time-series  
499 using DTW. We utilized the Ward D2 clustering method, which minimizes the sum of squared  
500 differences from the centroid during the merging of clusters. This hierarchical clustering of the  
501 12 RSV epidemics in each region created a hierarchy of groups. As the level in the hierarchy  
502 increased, clusters were formed by merging clusters from the next lower level, resulting in an  
503 ordered sequence of groupings.

504

## 505 **Transmission dynamic models**

506

507 We used an age-stratified Susceptible-Infected-Susceptible (SIS) model, taking into account  
508 repeat infections, to describe the transmission dynamics of RSV. The model was initially  
509 proposed by Pitzer et al. (29) to study the environmental drivers of the spatiotemporal dynamics  
510 of RSV in the US. The model assumed individuals were born with protective maternal  
511 immunity, which waned exponentially, leaving the infants susceptible to infection. We  
512 assumed a progressive build-up of immunity following up to four previous infections.  
513 Following infection with RSV, individuals developed partial immunity, reducing the rate of  
514 subsequent infection and relative infectiousness of the following infections. We also assumed

515 subsequent infections had a shortened recovery time compared to primary infections.  
516 Transmission-relevant contact patterns were assumed to be frequency-dependent and were  
517 consistent with the previous work (29). The model was able to reproduce the seasonal annual  
518 or biennial patterns of RSV transmission in different regions of the US. To model influenza  
519 transmission dynamics, we used a Susceptible-Infected-Recovered-Susceptible (SIRS) model.  
520 We assumed waning immunity for recovered individuals, allowing influenza infection to recur  
521 following the influenza pandemic in the 2009/10 and 2010/11 seasons.

522

523 The RSV and influenza transmission models were coupled through three hypothetical viral  
524 interference mechanisms. The first mechanism assumed influenza infection reduced the host's  
525 susceptibility to subsequent RSV coinfections, modulating the infection rate of susceptible  
526 individuals (**Fig. S6A**), captured by a parameter  $\theta$ , i.e.  $dX_{si}/dt = -\theta\lambda_I X_{si} + \lambda_2 X_{ss} - \gamma_2 X_{si}$   
527 (Eq. (10) in **Supplementary Materials**). The second mechanism assumed influenza infection  
528 reduced the infectious period (i.e. increased the rate of recovery) of subsequent RSV  
529 coinfections (**Fig. S6B**), captured by a parameter  $\eta$ , i.e.  $dX_{ii}/dt = -\eta\gamma_I X_{ii} + \lambda_I X_{si} +$   
530  $\lambda_2 X_{is} - \gamma_2 X_{ii}$  (Eq. (11) in **Supplementary Materials**). The third mechanism assumed  
531 influenza infection reduced the force of infection of RSV (**Fig. S6C**), captured by a parameter  
532  $\xi$ , i.e.  $\lambda_I = \xi\beta_I(t)X_{ai}$ , where  $X_{ai}$ ,  $a = \{i1, i2, i3, i4\}$  represents coinfection terms. The model was  
533 described by a system of ordinary differential equations (ODEs); see **Supplementary**  
534 **Materials** for details.

535

### 536 **Model calibration**

537 To calibrate the model parameters, we first fit the RSV dynamic model to the laboratory reports  
538 of positive RSV specimens from 2007 to 2019. We estimated the seasonal amplitude ( $\alpha_I$ ),

539 seasonal offset ( $\phi_1$ ) and reporting fraction ( $f$ ) for each region, respectively, using maximum  
540 likelihood estimation. The likelihood of the data given the model was calculated by assuming  
541 the number of positive cases in each week was Poisson-distributed with a mean equal to the  
542 model-predicted cases times the reporting fraction. Other parameter values for the model were  
543 adopted from (29), and are provided in Table 1 in the **Supplementary Materials**. For the  
544 influenza model, we assumed the mean infectious period for primary and secondary influenza  
545 infections is 8 days (55), the duration of waning immunity is 40 weeks, and the seasonal  
546 amplitude is equal to that estimated for RSV. We started by simulating only the RSV epidemic  
547 model, seeding the model with one RSV-infected individual in each age group except the <1  
548 year-old age group. We used a burn-in period of 60 or 61 years, depending upon the region that  
549 exhibits either an annual or biennial RSV pattern, to ensure the RSV model reached an  
550 equilibrium quasi-steady state. Influenza infection was introduced to the population after the  
551 model reached the equilibrium quasi-steady state.

552

553 To probe the effects of viral interference from pdmH1N1 infection on shaping RSV epidemics,  
554 we applied Latin Hypercube Sampling (LHS) to generate representative samples from a wide  
555 range of values for the parameter space  $\Phi = (\theta, \beta_2, \phi_2, \tau)$ , where  $\theta = (\theta, \xi, \eta)$  represents  
556 interference parameters;  $\beta_2$  is the transmission rate of the pdmH1N1 virus;  $\phi_2$  is the seasonal  
557 phase offset of influenza dynamics, and  $\tau$  is the time point when influenza infection is seeded  
558 in the population. We generated 100,000 samples from a uniform distribution  $U(0,1)$  for the  
559 parameter  $\theta$  and  $\xi$ , respectively, and from a uniform distribution  $U(1,3)$  for the parameter  $\eta$ .  
560 We also sampled 100,000 values from a uniform distribution  $U(100,110)$  for the parameter  $\tau$ ,  
561 mimicking the onset time of the second H1N1 pandemic wave during the winter of 2009.  
562 Additionally, 100,000 samples were obtained from a uniform distribution  $U(2,3)$  for the

563 parameter  $\beta_2$ , based on the estimates of the basic reproduction number of the H1N1 pandemic  
564 virus in the United States (56). 100,000 values of seasonal offset of influenza  $\phi_2$  were sampled  
565 from a uniform distribution  $U(-I, I)$ .

566

567 Next, we explored the parameter space for each viral interference mechanism separately. We  
568 generated forward simulations using the sampled 100,000 parameter sets and calculated the  
569 likelihood to evaluate the “goodness-of-fit” of the model. The data that we used was the weekly  
570 RSV positive tests in the 2009/10 season in Region 1 (CT: Connecticut, ME: Maine, MA:  
571 Massachusetts, NH: New Hampshire, RI: Rhode Island, and VT: Vermont), Region 4 (AL:  
572 Alabama, FL: Florida, GA: Georgia, KY: Kentucky, MS: Mississippi, NC: North Carolina, SC:  
573 South Carolina, and TN: Tennessee) or Region 10 (AK: Alaska, ID: Idaho, OR: Oregon, and  
574 WA: Washington), respectively. We focused on the 2009/10 season data because that was the  
575 season when only the pdmH1N1 virus circulated in the population. We used the following  
576 2010/11 season for model validation. For each set of parameters, the likelihood of the data  
577 given the model was calculated by assuming the number of positive cases in each week was  
578 Poisson-distributed with a mean equal to the model-predicted cases divided by corresponding  
579 weekly scaling factors. We ranked the negative likelihood in an ascending order and  
580 determined the distributions of parameter values  $(\theta, \xi, \eta)$  based on the top 2% (i.e., the first  
581 2000) models.

582

### 583 **List of Supplementary Materials**

584 Supplementary Figures: Fig. S1 to S12 (pdf file)

585 Supplementary Materials (pdf file)

586



## 587 Reference

- 588 1. M. Tin Tin Htar, M. S. Yerramalla, J. C. Moisi, D. L. Swerdlow, The burden of respiratory  
589 syncytial virus in adults: a systematic review and meta-analysis. *Epidemiol. Infect.* **148**,  
590 e48 (2020).
- 591 2. T. Shi, D. A. McAllister, K. L. O'Brien, E. A. F. Simoes, S. A. Madhi, B. D. Gessner, F. P.  
592 Polack, E. Balsells, S. Acacio, C. Aguayo, I. Alassani, A. Ali, M. Antonio, S. Awasthi, J.  
593 O. Awori, E. Azziz-Baumgartner, H. C. Baggett, V. L. Baillie, A. Balmaseda, A.  
594 Barahona, S. Basnet, Q. Bassat, W. Basualdo, G. Bigogo, L. Bont, R. F. Breiman, W. A.  
595 Brooks, S. Broor, N. Bruce, D. Bruden, P. Buchy, S. Campbell, P. Carosone-Link, M.  
596 Chadha, J. Chipeta, M. Chou, W. Clara, C. Cohen, E. de Cuellar, D.-A. Dang, B. Dash-  
597 Yandag, M. Deloria-Knoll, M. Dherani, T. Eap, B. E. Ebruke, M. Echavarria, C. C. de  
598 Freitas Lázaro Emediato, R. A. Fasce, D. R. Feikin, L. Feng, A. Gentile, A. Gordon, D.  
599 Goswami, S. Goyet, M. Groome, N. Halasa, S. Hirve, N. Homaira, S. R. C. Howie, J.  
600 Jara, I. Jroundi, C. B. Kartasasmita, N. Khuri-Bulos, K. L. Kotloff, A. Krishnan, R.  
601 Libster, O. Lopez, M. G. Lucero, F. Lucion, S. P. Lupisan, D. N. Marcone, J. P.  
602 McCracken, M. Mejia, J. C. Moisi, J. M. Montgomery, D. P. Moore, C. Moraleda, J.  
603 Moyes, P. Munywoki, K. Mutyara, M. P. Nicol, D. J. Nokes, P. Nymadawa, M. T. da  
604 Costa Oliveira, H. Oshitani, N. Pandey, G. Paranhos-Baccalà, L. N. Phillips, V. S. Picot,  
605 M. Rahman, M. Rakoto-Andrianarivelo, Z. A. Rasmussen, B. A. Rath, A. Robinson, C.  
606 Romero, G. Russomando, V. Salimi, P. Sawatwong, N. Scheltema, B. Schweiger, J. A.  
607 G. Scott, P. Seidenberg, K. Shen, R. Singleton, V. Sotomayor, T. A. Strand, A. Sutanto,  
608 M. Sylla, M. D. Tapia, S. Thamthitawat, E. D. Thomas, R. Tokarz, C. Turner, M. Venter,  
609 S. Waicharoen, J. Wang, W. Watthanaworawit, L.-M. Yoshida, H. Yu, H. J. Zar, H.  
610 Campbell, H. Nair, RSV Global Epidemiology Network, Global, regional, and national  
611 disease burden estimates of acute lower respiratory infections due to respiratory  
612 syncytial virus in young children in 2015: a systematic review and modelling study.  
613 *Lancet.* **390**, 946–958 (2017).
- 614 3. Y. Li, X. Wang, D. M. Blau, M. T. Caballero, D. R. Feikin, C. J. Gill, S. A. Madhi, S. B.  
615 Omer, E. A. F. Simões, H. Campbell, A. B. Pariente, D. Bardach, Q. Bassat, J.-S.  
616 Casalegno, G. Chakhunashvili, N. Crawford, D. Danilenko, L. A. H. Do, M. Echavarria,  
617 A. Gentile, A. Gordon, T. Heikkinen, Q. S. Huang, S. Jullien, A. Krishnan, E. L. Lopez, J.  
618 Markić, A. Mira-Iglesias, H. C. Moore, J. Moyes, L. Mwananyanda, D. J. Nokes, F.  
619 Noordeen, E. Obodai, N. Palani, C. Romero, V. Salimi, A. Satav, E. Seo, Z. Shchomak,  
620 R. Singleton, K. Stolyarov, S. K. Stoszek, A. von Gottberg, D. Wurzel, L.-M. Yoshida, C.  
621 F. Yung, H. J. Zar, Respiratory Virus Global Epidemiology Network, H. Nair, RESCEU  
622 investigators, Global, regional, and national disease burden estimates of acute lower  
623 respiratory infections due to respiratory syncytial virus in children younger than 5 years  
624 in 2019: a systematic analysis. *Lancet.* **399**, 2047–2064 (2022).
- 625 4. M. L. Boron, L. Edelman, J. R. Groothuis, F. J. Malinoski, A novel active respiratory  
626 syncytial virus surveillance system in the United States: variability in the local and  
627 regional incidence of infection. *Pediatr. Infect. Dis. J.* **27**, 1095–1098 (2008).
- 628 5. I. Kuitunen, M. Renko, Lessons to learn from the current pandemic for future non-  
629 pharmaceutical interventions against the respiratory syncytial virus – nationwide  
630 register-study in Finland. *Infect. Dis.* **53**, 476–478 (2021).
- 631 6. Z. Zheng, V. E. Pitzer, E. D. Shapiro, L. J. Bont, D. M. Weinberger, Estimation of the  
632 Timing and Intensity of Reemergence of Respiratory Syncytial Virus Following the  
633 COVID-19 Pandemic in the US. *JAMA Netw Open.* **4**, e2141779 (2021).
- 634 7. J. S. Casalegno, M. Ottmann, M. Bouscambert-Duchamp, M. Valette, F. Morfin, B. Lina,

- 635 Impact of the 2009 influenza A(H1N1) pandemic wave on the pattern of hibernal  
636 respiratory virus epidemics, France, 2009. *Euro Surveill.* **15** (2010) (available at  
637 <https://www.ncbi.nlm.nih.gov/pubmed/20158981>).
- 638 8. T. Meningher, M. Hindiyeh, L. Regev, H. Sherbany, E. Mendelson, M. Mandelboim,  
639 Relationships between A(H1N1)pdm09 influenza infection and infections with other  
640 respiratory viruses. *Influenza Other Respi. Viruses.* **8**, 422–430 (2014).
- 641 9. S. Hirsh, M. Hindiyeh, L. Kolet, L. Regev, H. Sherbany, K. Yaary, E. Mendelson, M.  
642 Mandelboim, Epidemiological changes of respiratory syncytial virus (RSV) infections in  
643 Israel. *PLoS One.* **9**, e90515 (2014).
- 644 10. N. Schnepf, M. Resche-Rigon, A. Chaillon, A. Scemla, G. Gras, O. Semoun, P.  
645 Taboulet, J.-M. Molina, F. Simon, A. Goudeau, J. LeGoff, High burden of non-influenza  
646 viruses in influenza-like illness in the early weeks of H1N1v epidemic in France. *PLoS*  
647 *One.* **6**, e23514 (2011).
- 648 11. G. C. Mak, A. H. Wong, W. Y. Y. Ho, W. Lim, The impact of pandemic influenza A  
649 (H1N1) 2009 on the circulation of respiratory viruses 2009-2011. *Influenza Other Respi.*  
650 *Viruses.* **6**, e6–10 (2012).
- 651 12. L. Yang, K. H. Chan, L. K. P. Suen, K. P. Chan, X. Wang, P. Cao, D. He, J. S. M. Peiris,  
652 C. M. Wong, Impact of the 2009 H1N1 Pandemic on Age-Specific Epidemic Curves of  
653 Other Respiratory Viruses: A Comparison of Pre-Pandemic, Pandemic and Post-  
654 Pandemic Periods in a Subtropical City. *PLoS One.* **10**, e0125447 (2015).
- 655 13. J. Piret, G. Boivin, Viral Interference between Respiratory Viruses. *Emerg. Infect. Dis.*  
656 **28**, 273–281 (2022).
- 657 14. A. J. Gonzalez, E. C. Ijezie, O. B. Balemba, T. A. Miura, Attenuation of Influenza A Virus  
658 Disease Severity by Viral Coinfection in a Mouse Model. *J. Virol.* **92** (2018),  
659 doi:10.1128/JVI.00881-18.
- 660 15. K. F. Chan, L. A. Carolan, D. Korenkov, J. Druce, J. McCaw, P. C. Reading, I. G. Barr,  
661 K. L. Laurie, Investigating Viral Interference Between Influenza A Virus and Human  
662 Respiratory Syncytial Virus in a Ferret Model of Infection. *J. Infect. Dis.* **218**, 406–417  
663 (2018).
- 664 16. S. Bhattacharyya, P. H. Gesteland, K. Korgenski, O. N. Bjørnstad, F. R. Adler, Cross-  
665 immunity between strains explains the dynamical pattern of paramyxoviruses. *Proc.*  
666 *Natl. Acad. Sci. U. S. A.* **112**, 13396–13400 (2015).
- 667 17. N. R. Cheemarla, T. A. Watkins, V. T. Mihaylova, E. F. Foxman, Viral Interference  
668 During Influenza A–SARS-CoV-2 Coinfection of the Human Airway Epithelium and  
669 Reversal by Oseltamivir. *J. Infect. Dis.*, jiad402 (2023).
- 670 18. L. Opatowski, M. Baguelin, R. M. Eggo, Influenza interaction with cocirculating  
671 pathogens and its impact on surveillance, pathogenesis, and epidemic profile: A key  
672 role for mathematical modelling. *PLoS Pathog.* **14**, e1006770 (2018).
- 673 19. S. Nickbakhsh, C. Mair, L. Matthews, R. Reeve, P. C. D. Johnson, F. Thorburn, B. von  
674 Wissmann, A. Reynolds, J. McMenamin, R. N. Gunson, P. R. Murcia, Virus–virus  
675 interactions impact the population dynamics of influenza and the common cold.  
676 *Proceedings of the National Academy of Sciences.* **116**, 27142–27150 (2019).
- 677 20. W. Hendriks, H. Boshuizen, A. Dekkers, M. Knol, G. A. Donker, A. van der Ende, H.

- 678 Korthals Altes, Temporal cross-correlation between influenza-like illnesses and invasive  
679 pneumococcal disease in The Netherlands. *Influenza Other Respi. Viruses*. **11**, 130–  
680 137 (2017).
- 681 21. R. E. G. Upshur, R. Moineddin, E. J. Crighton, M. Mamdani, Interactions of viral  
682 pathogens on hospital admissions for pneumonia, croup and chronic obstructive  
683 pulmonary diseases: results of a multivariate time-series analysis. *Epidemiol. Infect.*  
684 **134**, 1174–1178 (2006).
- 685 22. K. P. Tao, M. K. C. Chong, K. Y. Y. Chan, J. C. S. Pun, J. G. S. Tsun, S. M. W. Chow,  
686 C. S. H. Ng, M. H. T. Wang, P. K. S. Chan, A. M. Li, R. W. Y. Chan, Suppression of  
687 influenza virus infection by rhinovirus interference - at the population, individual and  
688 cellular levels. *Curr. Res. Microb. Sci.* **3**, 100147 (2022).
- 689 23. N. C. Grassly, C. Fraser, Mathematical models of infectious disease transmission. *Nat.*  
690 *Rev. Microbiol.* **6**, 477–487 (2008).
- 691 24. F. Brauer, C. Castillo-Chavez, Z. Feng, *Mathematical Models in Epidemiology* (Springer  
692 New York).
- 693 25. L. Pinky, H. M. Dobrovolny, Epidemiological Consequences of Viral Interference: A  
694 Mathematical Modeling Study of Two Interacting Viruses. *Front. Microbiol.* **13**, 830423  
695 (2022).
- 696 26. N. R. Waterlow, S. Flasche, A. Minter, R. M. Eggo, Competition between RSV and  
697 influenza: Limits of modelling inference from surveillance data. *Epidemics*. **35**, 100460  
698 (2021).
- 699 27. N. R. Waterlow, M. Toizumi, E. van Leeuwen, H.-A. Thi Nguyen, L. Myint-Yoshida, R.  
700 M. Eggo, S. Flasche, Evidence for influenza and RSV interaction from 10 years of  
701 enhanced surveillance in Nha Trang, Vietnam, a modelling study. *PLoS Comput. Biol.*  
702 **18**, e1010234 (2022).
- 703 28. S. C. Kramer, J.-S. Casalegno, M. Domenech de Cellès, Characterizing the  
704 epidemiological interactions between influenza and respiratory syncytial viruses and  
705 their implications for epidemic control. *bioRxiv* (2022), ,  
706 doi:10.1101/2022.11.29.22282872.
- 707 29. V. E. Pitzer, C. Viboud, W. J. Alonso, T. Wilcox, C. J. Metcalf, C. A. Steiner, A. K.  
708 Haynes, B. T. Grenfell, Environmental drivers of the spatiotemporal dynamics of  
709 respiratory syncytial virus in the United States. *PLoS Pathog.* **11**, e1004591 (2015).
- 710 30. H. Sakoe, S. Chiba, Dynamic programming algorithm optimization for spoken word  
711 recognition. *IEEE Trans. Acoust.* **26**, 43–49 (1978).
- 712 31. A. Wu, V. T. Mihaylova, M. L. Landry, E. F. Foxman, Interference between rhinovirus  
713 and influenza A virus: a clinical data analysis and experimental infection study. *Lancet*  
714 *Microbe*. **1**, e254–e262 (2020).
- 715 32. M. C. Swets, C. D. Russell, E. M. Harrison, A. B. Docherty, N. Lone, M. Girvan, H. E.  
716 Hardwick, L. G. Visser, P. J. M. Openshaw, G. H. Groeneveld, M. G. Semple, J. K.  
717 Baillie, SARS-CoV-2 co-infection with influenza viruses, respiratory syncytial virus, or  
718 adenoviruses. *Lancet*. **399**, 1463–1464 (2022).
- 719 33. A. Handel, L. E. Liao, C. A. A. Beauchemin, Progress and trends in mathematical  
720 modelling of influenza A virus infections. *Current Opinion in Systems Biology*. **12**, 30–36

- 721 (2018).
- 722 34. N. Tuncer, H. Gulbudak, V. L. Cannataro, M. Martcheva, Structural and Practical  
723 Identifiability Issues of Immuno-Epidemiological Vector-Host Models with Application to  
724 Rift Valley Fever. *Bull. Math. Biol.* **78**, 1796–1827 (2016).
- 725 35. N. Tuncer, M. Marctheva, B. LaBarre, S. Payoute, Structural and Practical Identifiability  
726 Analysis of Zika Epidemiological Models. *Bull. Math. Biol.* **80**, 2209–2241 (2018).
- 727 36. Y.-H. Kao, M. C. Eisenberg, Practical unidentifiability of a simple vector-borne disease  
728 model: Implications for parameter estimation and intervention assessment. *Epidemics.*  
729 **25**, 89–100 (2018).
- 730 37. R. E. Baker, S. W. Park, W. Yang, G. A. Vecchi, C. J. E. Metcalf, B. T. Grenfell, The  
731 impact of COVID-19 nonpharmaceutical interventions on the future dynamics of  
732 endemic infections. *Proceedings of the National Academy of Sciences.* **117**, 30547–  
733 30553 (2020).
- 734 38. Y. N. Löwensteyn, Z. Zheng, N. Rave, M. A. G. E. Bannier, M.-N. Billard, J.-S.  
735 Casalegno, V. E. Pitzer, J. G. Wildenbeest, D. M. Weinberger, L. Bont, Surveillance of  
736 Pediatric REspiratory Admissions in Dutch hospitals (SPREAD) Study Group, Year-  
737 Round Respiratory Syncytial Virus Transmission in The Netherlands Following the  
738 COVID-19 Pandemic: A Prospective Nationwide Observational and Modeling Study. *J.*  
739 *Infect. Dis.* **228**, 1394–1399 (2023).
- 740 39. J. R. Hamilton, D. Sachs, J. K. Lim, R. A. Langlois, P. Palese, N. S. Heaton, Club cells  
741 surviving influenza A virus infection induce temporary nonspecific antiviral immunity.  
742 *Proc. Natl. Acad. Sci. U. S. A.* **113**, 3861–3866 (2016).
- 743 40. C. A. Johnson-Delaney, S. E. Orosz, *Vet. Clin. North Am. Exot. Anim. Pract.*, in press.
- 744 41. Y. Cao, Y. Huang, K. Xu, Y. Liu, X. Li, Y. Xu, W. Zhong, P. Hao, Differential responses  
745 of innate immunity triggered by different subtypes of influenza A viruses in human and  
746 avian hosts. *BMC Med. Genomics.* **10**, 70 (2017).
- 747 42. J. van Summeren, A. Meijer, G. Aspelund, J. S. Casalegno, G. Erna, U. Hoang, B. Lina,  
748 VRS study group in Lyon, S. de Lusignan, A. C. Teirlinck, V. Thors, J. Paget, Low levels  
749 of respiratory syncytial virus activity in Europe during the 2020/21 season: what can we  
750 expect in the coming summer and autumn/winter? *Euro Surveill.* **26** (2021),  
751 doi:10.2807/1560-7917.ES.2021.26.29.2100639.
- 752 43. D. K. Yeoh, D. A. Foley, C. A. Minney-Smith, A. C. Martin, A. O. Mace, C. T. Sikazwe,  
753 H. Le, A. Levy, C. C. Blyth, H. C. Moore, Impact of Coronavirus Disease 2019 Public  
754 Health Measures on Detections of Influenza and Respiratory Syncytial Virus in Children  
755 During the 2020 Australian Winter. *Clin. Infect. Dis.* **72**, 2199–2202 (2021).
- 756 44. J. Mereckiene, S. Cotter, J. T. Weber, A. Nicoll, F. D’Ancona, P. L. Lopalco, K.  
757 Johansen, A. M. Wasley, P. Jorgensen, D. Lévy-Bruhl, C. Giambi, P. Stefanoff, L.  
758 Dematte, D. O’Flanagan, VENICE project gatekeepers group, Influenza A(H1N1)pdm09  
759 vaccination policies and coverage in Europe. *Euro Surveill.* **17** (2012),  
760 doi:10.2807/ese.17.04.20064-en.
- 761 45. K. Hebbrecht, M. Stuivenga, T. Birkenhäger, M. Morrens, E. I. Fried, B. Sabbe, E. J.  
762 Giltay, Understanding personalized dynamics to inform precision medicine: a dynamic  
763 time warp analysis of 255 depressed inpatients. *BMC Med.* **18**, 400 (2020).

- 764 46. J. Mellor, C. E. Overton, M. Fyles, L. Chawner, J. Baxter, T. Baird, T. Ward,  
765 Understanding the leading indicators of hospital admissions from COVID-19 across  
766 successive waves in the UK. *Epidemiol. Infect.* **151**, e172 (2023).
- 767 47. L. Miralles-Pechuán, A. Kumar, A. L. Suárez-Cetrulo, Forecasting COVID-19 cases  
768 using dynamic time warping and incremental machine learning methods. *Expert Syst.*  
769 **40** (2023), doi:10.1111/exsy.13237.
- 770 48. J.-D. Morel, J.-M. Morel, L. Alvarez, Time warping between main epidemic time series in  
771 epidemiological surveillance. *PLoS Comput. Biol.* **19**, e1011757 (2023).
- 772 49. Z. Luo, L. Zhang, N. Liu, Y. Wu, Time series clustering of COVID-19 pandemic-related  
773 data. *Data Science and Management.* **6**, 79–87 (2023).
- 774 50. R. M. Anderson, H. Heesterbeek, D. Klinkenberg, T. D. Hollingsworth, How will country-  
775 based mitigation measures influence the course of the COVID-19 epidemic? *Lancet.*  
776 **395**, 931–934 (2020).
- 777 51. S. Sakleshpur, A. L. Steed, Influenza: Toward understanding the immune response in  
778 the young. *Front Pediatr.* **10**, 953150 (2022).
- 779 52. R. M. Hamilton, R. E. Foster, T. J. Gibb, C. J. Johannsen, J. B. Santini, Pre-visible  
780 Detection of Grub Feeding in Turfgrass using Remote Sensing. *Photogrammetric*  
781 *Engineering & Remote Sensing.* **75**, 179–192 (2009).
- 782 53. P. Senin, Dynamic time warping algorithm review (2008) (available at  
783 <https://www.semanticscholar.org/paper/Dynamic-Time-Warping-Algorithm-Review-Senin/8096fe77e22ee54d829861642ac71064d866b913>).
- 785 54. T. Giorgino, Computing and Visualizing Dynamic Time Warping Alignments in R: The  
786 dtw Package. *J. Stat. Softw.* **31**, 1–24 (2009).
- 787 55. G. De Serres, I. Rouleau, M. E. Hamelin, C. Quach, D. Skowronski, L. Flamand, N.  
788 Boulianne, Y. Li, J. Carbonneau, A. Bourgault, M. Couillard, H. Charest, G. Boivin,  
789 Contagious period for pandemic (H1N1) 2009. *Emerg. Infect. Dis.* **16**, 783–788 (2010).
- 790 56. L. F. White, J. Wallinga, L. Finelli, C. Reed, S. Riley, M. Lipsitch, M. Pagano, Estimation  
791 of the reproductive number and the serial interval in early phase of the 2009 influenza  
792 A/H1N1 pandemic in the USA. *Influenza Other Respi. Viruses.* **3**, 267–276 (2009).

793  
794

795 **Acknowledgments:** This work was supported by a grant from the National Institutes of  
796 Health (R01AI137093). The content is solely the responsibility of the authors and does not  
797 necessarily represent the official views of the National Institutes of Health.

798

799 **Author contribution:**

800 Conceptualization; KL, DMW, VEP

801 Data curation; KL  
802 Formal analysis; KL, DMW, VEP  
803 Funding acquisition; DMW, VEP  
804 Methodology; KL, DMW, VEP  
805 Software; KL  
806 Supervision; DMW, VEP  
807 Visualization; KL  
808 Writing - original draft; KL  
809 Writing - review & editing; KL, DT, DMW, VEP  
810 All authors read and approved the final manuscript.

811  
812

813 **Competing interests:** DMW has been principal investigator on grants from Pfizer and  
814 Merck to Yale University for work unrelated to this manuscript and has received consulting  
815 and/or speaking fees from Pfizer, Merck, and GSK/Affinivax. The other authors declare no  
816 competing interests.

817  
818

819 **Data and availability:** All visualization was performed in R (version 4.0.2), and code to  
820 produce all figures and data used in this analysis are available in the GitHub repository  
821 <https://github.com/keli5734/viral-interference>.

822  
823  
824  
825

## Figures

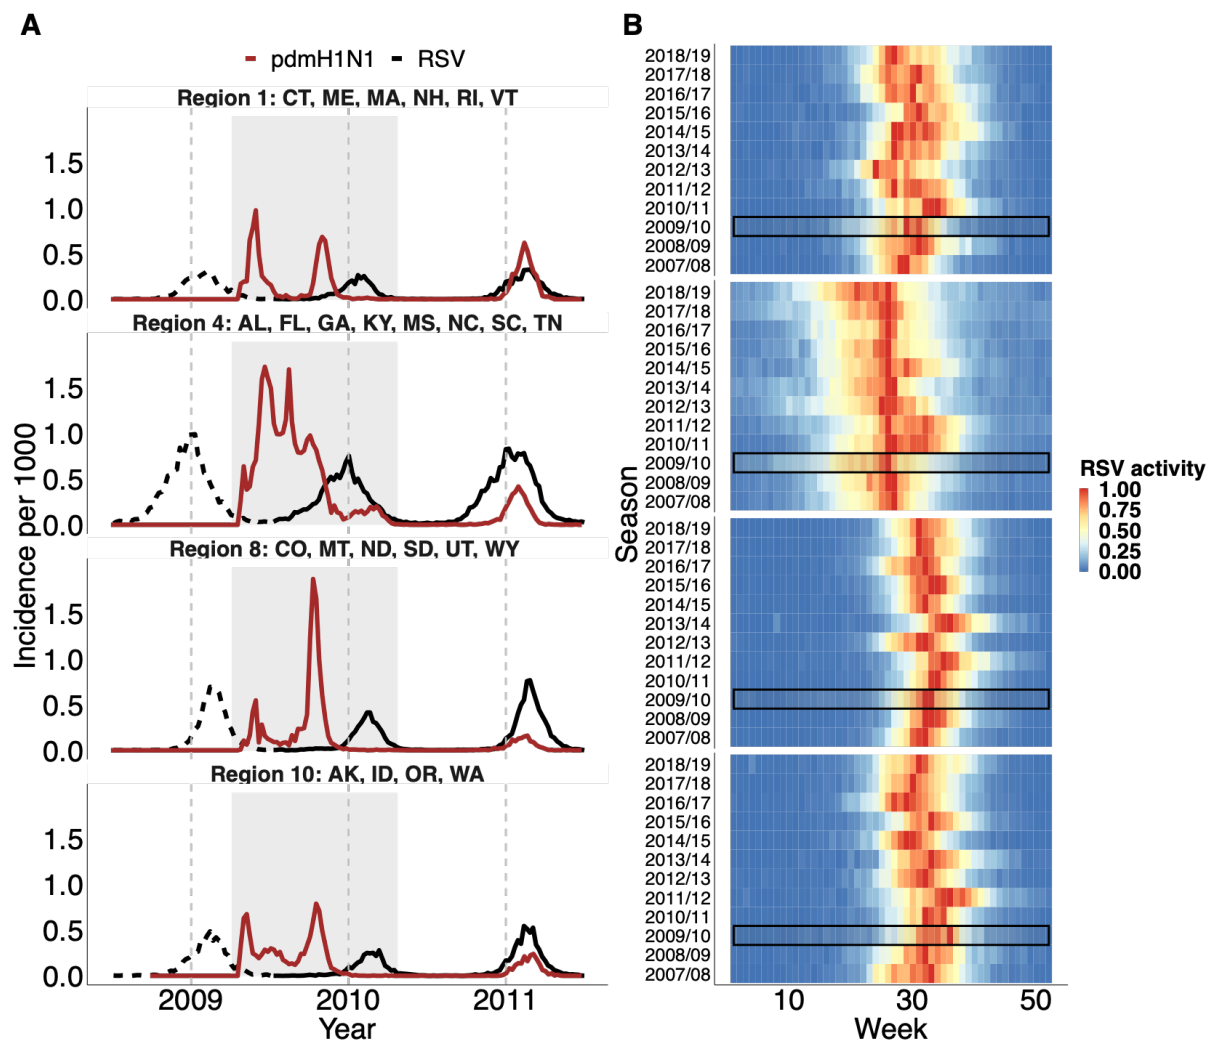

**Fig. 1. Laboratory-confirmed positive tests for pdmH1N1 virus and RSV following the pandemic.**

**(A)** Positive laboratory tests for pdmH1N1 virus (red) and RSV (black) before (dashed line), during (shaded area) and following the 2009 influenza pandemic in Region 1 (CT: Connecticut, ME: Maine, MA: Massachusetts, NH: New Hampshire, RI: Rhode Island, VT: Vermont), Region 4 (AL: Alabama, FL: Florida, GA: Georgia, KY: Kentucky, MS: Mississippi, NC: North Carolina, SC: South Carolina, TN: Tennessee) Region 8 (CO: Colorado, MT: Montana, ND: North Dakota, SD: South Dakota, UT: Utah, WY: Wyoming) and Region 10 (AK: Alaska, ID: Idaho, OR: Oregon, WA: Washington) of the US. Dashed gray lines indicate the 1st of January each year. **(B)** Heatmap of RSV activity by epidemic season for the four selected regions. Epidemic seasons are defined as starting in July and ending in June of the following year. RSV activity was calculated as the fraction of positive tests among the total number of tests for each season. The resulting fraction was then normalized to a range between 0 and 1,

with red indicating high activity and blue indicating low activity. RSV activity during the pandemic 2009/10 season is highlighted in the black box.

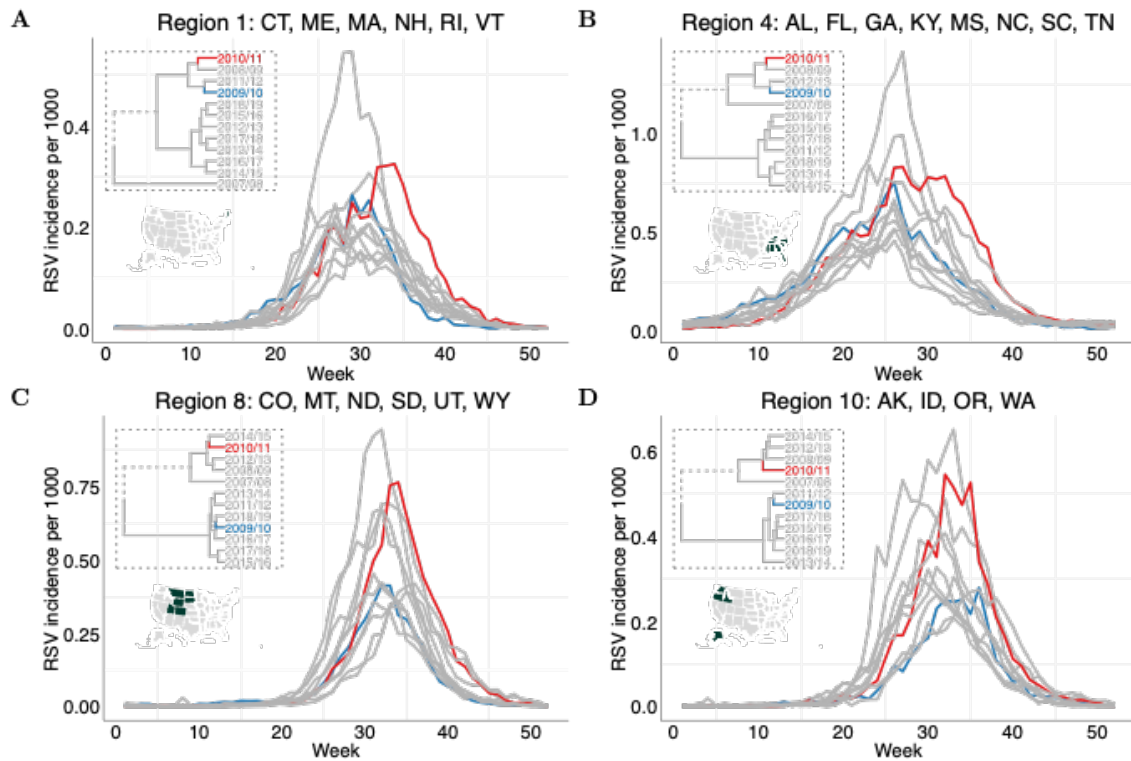

**Fig. 2. Hierarchical clusters and RSV time-series in the four selected regions.**

An agglomerative clustering algorithm with a Ward variance method was used to group the 12 RSV epidemic seasons in each region based on the alignment paths (Fig. S2). The dendrograms (in the dashed box) give the clustering results based on the optimal alignments between time-series computed by DTW. (A)-(D) show the dendrogram and corresponding RSV time-series in Regions 1, 4, 8 and 10, respectively. RSV time-series following the pandemic seasons are highlighted in blue (2009/10) and red (2010/11). The clustering results for other regions are given in Fig. S3.



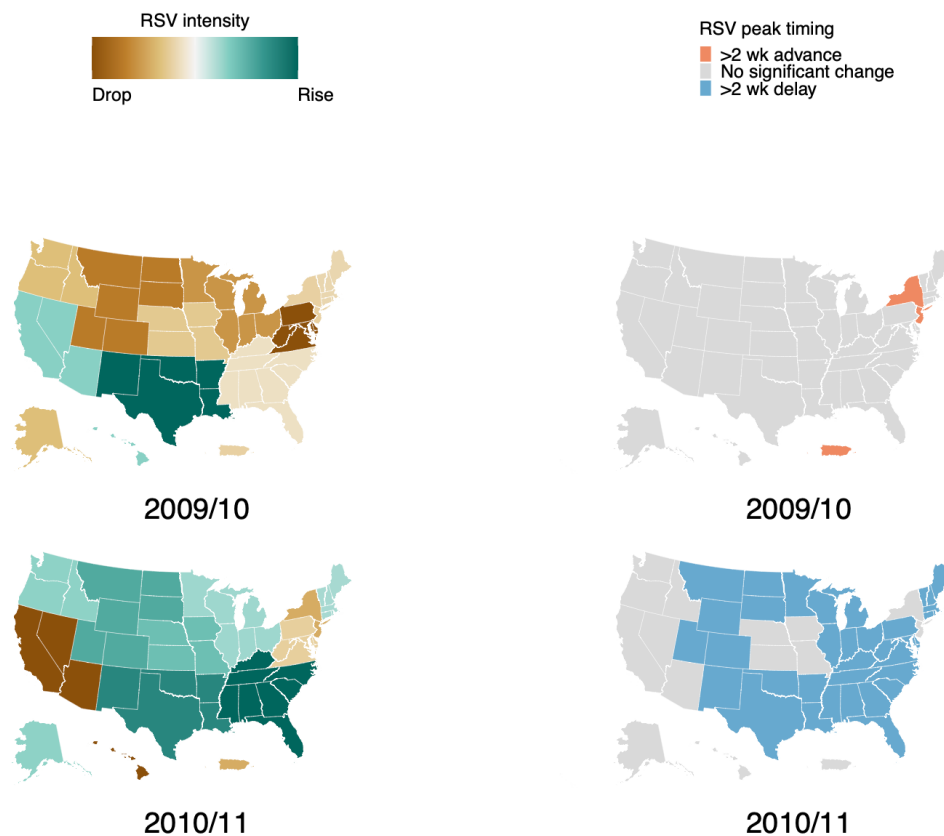

**Fig. 3. The changes in RSV intensity and the center of gravity of RSV activity following the pandemic.**

RSV intensity and the center of gravity of RSV activity were calculated for each epidemic season in each region of the US individually. For each region, the changes in the intensity of RSV activity in either the 2009/10 or 2010/11 season (i.e., query) were compared to the median values of all other seasons (i.e., reference), such that intensity changes =  $(\text{query} - \text{reference}) / \text{reference} \times 100\%$ . The changes in the center of gravity were given by the difference between the RSV-weighted weekly average for the query and the reference.

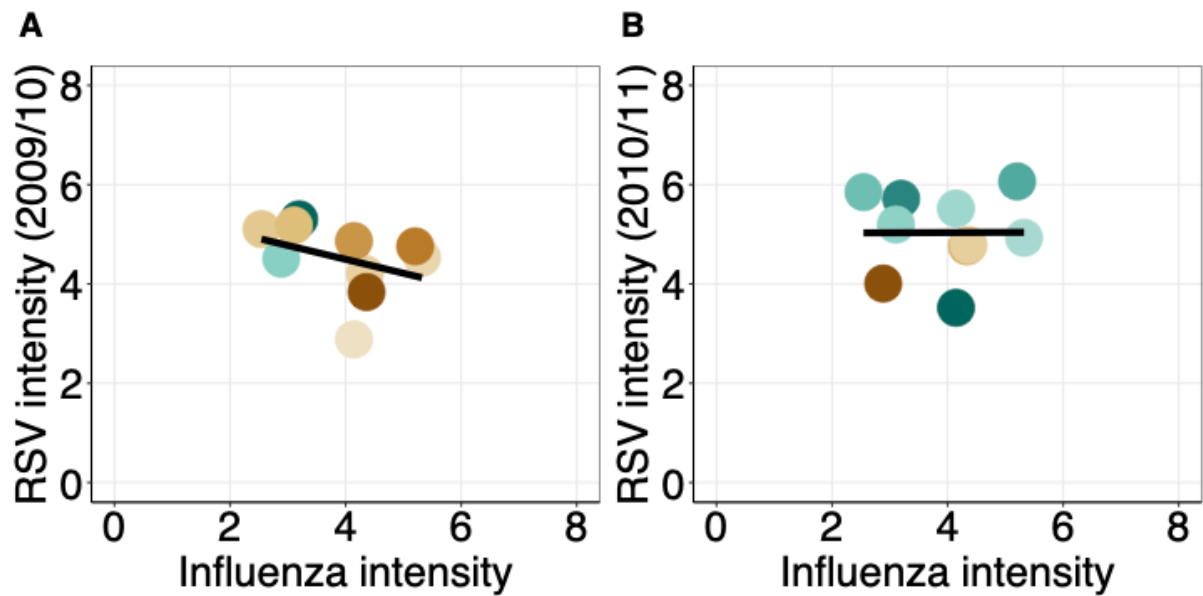

**Fig. 4. Correlations between RSV intensity and pdmH1N1 virus intensity.**

(A) The correlation between the intensity of RSV in the 2009/10 season and the intensity of pdmH1N1 virus during the pandemic period ( $\rho = -0.38$ ), and (B) the correlation between the intensity of RSV in the 2010/11 season and the intensity of pdmH1N1 virus during the pandemic period ( $\rho = 0$ ). The colors indicate the drop (brown) or rise (green) of RSV intensity in certain regions, corresponding to the US map in Fig. 3.

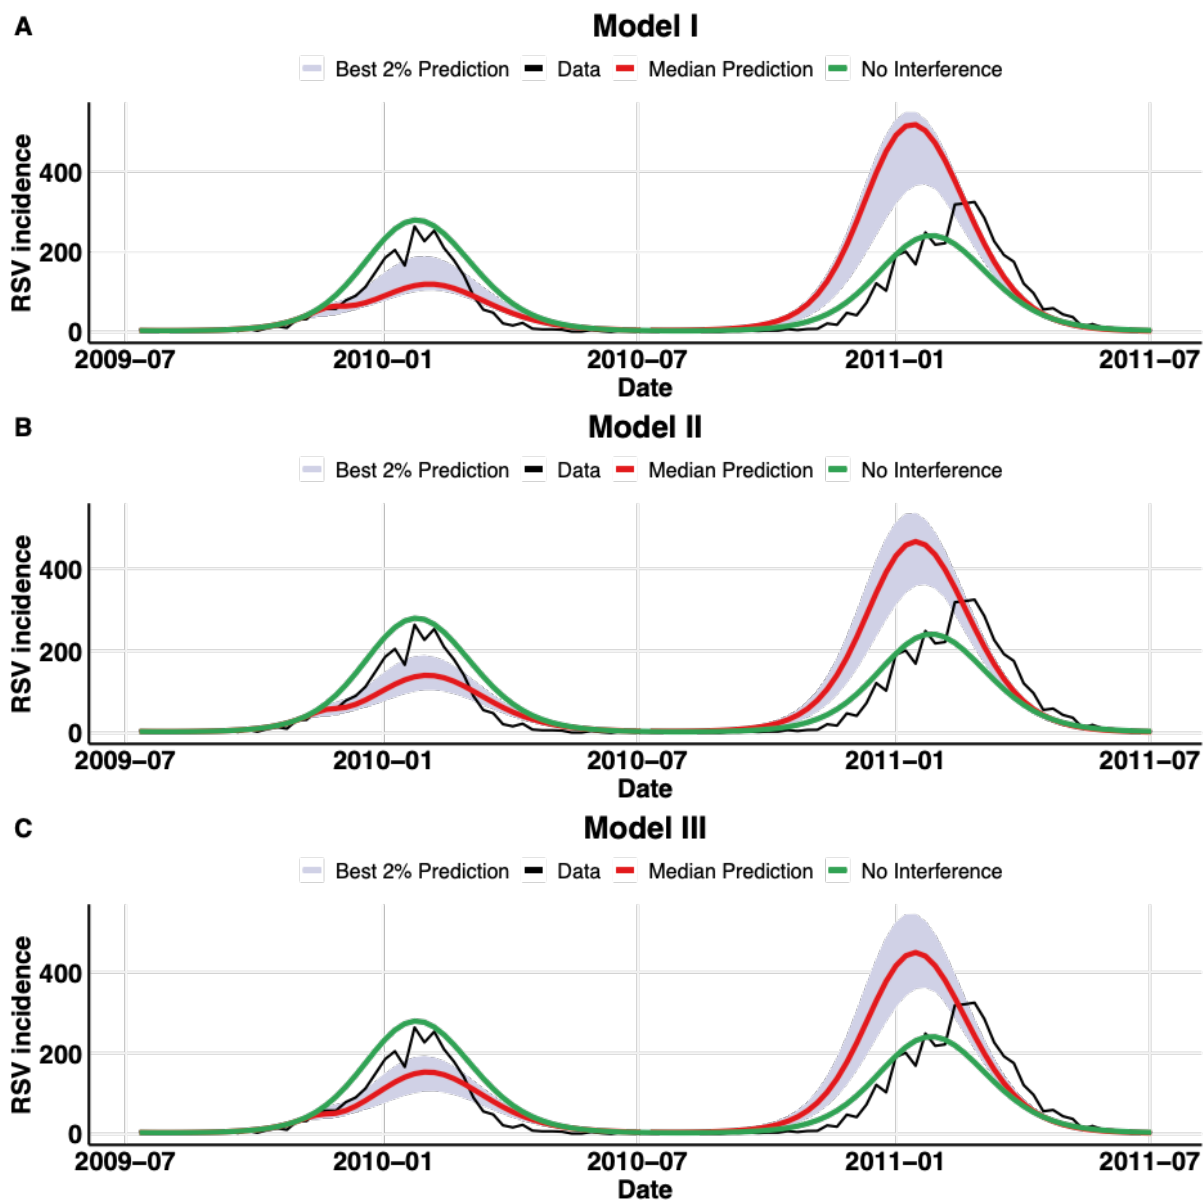

**Fig. 5. Results of model fits for laboratory-confirmed RSV-positive tests in the 2009/10 and 2010/11 seasons in Region 1.**

The observed number of RSV-positive tests in Region 1 is shown by the black line, while the top 2% of best-fitting models (based on 100,000 models generated from Latin Hypercube Sampling) is shown by the gray shaded region for (A) Model I—pdmH1N1 infection reduces susceptibility of RSV infection, (B) Model II—pdmH1N1 infection reduces RSV infectious period, and (C) Model III—pdmH1N1 infection reduces RSV infectivity. The median prediction, given by the median estimates of the viral interference parameter and associated other parameters, is indicated by the red curve. The green curve shows the scenario of no viral interference. Note that the models were only fitted to the RSV incidence data in the 2009/10 season, and the data from the 2010/11 season were used for model validation.

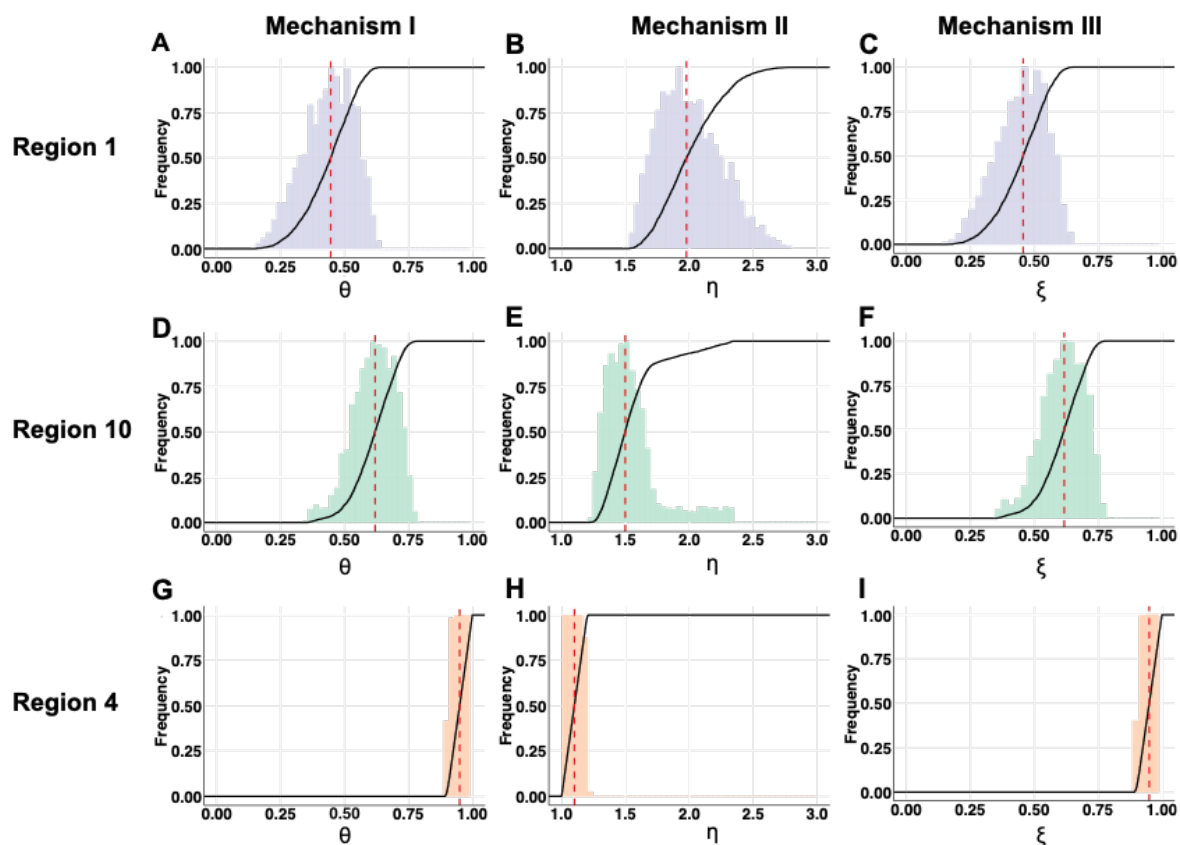

**Fig. 6. Identified parameter space for viral interference parameters.**

Histograms show the frequency of the values of viral interference parameters for the top 2% best-fitting models (2000 samples). The cumulative density functions (CDFs) are given by the solid lines, and the dashed red lines indicate the median estimates. (A, D, G) show the identified parameter distribution for the viral interference mechanism that reduces the host's susceptibility to RSV infection,  $\theta$  (Model I), in Region 1, 10 and 4, respectively. (B, E, H) show the identified parameter distribution for the viral interference mechanism that shortens RSV infectious period,  $\eta$  (Model II), in Region 1, 10 and 4, respectively. (C, F, I) show the identified parameter distribution for the viral interference mechanism that reduces RSV infectivity,  $\xi$  (Model III), in Region 1, 10 and 4, respectively.
